# Supplementary material for: The Role of General Practitioners in Transitioning Adolescents with Chronic Conditions to Adult Health Care
Source: Research Square preprint supplement (doi:10.21203/rs.3.rs-5887321/v1), 2025-05-06
Supplement: Supplementary file 1 [file 7504e46f9bc789c071dce53a.docx]

**Title: The Role of General Practitioners in Transitioning Adolescents with Chronic Conditions to Adult Health Care**

**Authors list:** **Jérémy Puyraimond-Zemmour1,3, Hélène Mellerio2,3,4, Ulrich Meinzer5,6, Stéphane Auvin7,8,9, Elise Bismuth14, Laurent Holvoet10, Bérengère Koehl10,11, Christine Martinez-Vinson13, Philippe Zerr12, Paul Jacquin3,4**

**Affiliations of the authors:**

1 Faculty of Medicine, University of Paris, France.

2 INSERM UMR-1123 ECEVE, Paris Cité University, Paris, France.

3 AD'venir, Adolescent Medicine Unit, Robert Debre Hospital, AP-HP, Paris, France.

4 French Clinical Research Group in Adolescent Medicine and Health, 97 bd de Port-Royal, 75014, Paris, France.

5 Department of General Paediatrics, Paediatric Internal Medicine, Rheumatology and Infectious Diseases, National Reference Centre for Rare Paediatric Inflammatory Rheumatisms and Systemic Autoimmune diseases (RAISE), Robert Debre Hospital, AP-HP, F-75019 Paris, France.

6 Paris Cité University, INSERM, Research Center on Inflammation, UMR 1149, F-75018, Paris, France

7 Department of Pediatric Neurology, CRMR Epilepsies Rares, Robert Debre Hospital, AP-HP, Paris, France.

8 INSERM UMR-1141 NeuroDiderot, University of Paris, France.

9 University Institute of France, Paris, France.

10 Referral Center for Sickle Cell Disease, Hematology Unit, Robert Debre Hospital, AP-HP, Paris, France.

11 INSERM UMR-1134, Integrated Biology of the Red Blood Cell, University of Paris, France.

12 Department of General Medicine, University of Paris, France.

13 Department of Pediatric Gastroenterology and Nutrition, Robert Debre Hospital, AP-HP, Paris, France.

14 Department of Pediatric Endocrinology and Diabetology, Robert Debre Hospital, AP-HP, Paris, France.

**Corresponding author:** Jérémy Puyraimond-Zemmour, Service d'Unité Médecine de l'Adolescent, 48 boulevard Sérurier, 75019 Paris, France, Tel: +33 (6) 88 84 92 95, e-mail: jeremy.puyraimondzemmour@aphp.fr

**Abstract:**

Background: General practitioners (GPs) play a key role in ensuring continuity of care for adolescents and young adults (AYAs) with chronic conditions (CCs). However, their involvement during the transition from pediatric to adult care remains limited, contributing to unsuccessful transitions.

Purpose: To explore the role of GPs during transition by analyzing their involvement in the care of various CCs.

Methods: A study involving GPs of 112 AYAs treated in a children’s hospital in Paris for CCs (diabetes mellitus, inflammatory bowel disease, epilepsy, sickle cell disease), transferred to adult care between 2017 and 2018. The study consisted of two parts: 1) Quantitative analysis combining retrospective data from Electronic Health Records (pathology, comorbidities, social history) and a phone survey of GPs (role in transition, factors facilitating their involvement); 2) Qualitative analysis (longer surveys with 27 GPs) exploring their experiences and expectations in communicating with hospitals about transition.

Results: Fifty percent of AYAs were registered with a GP during the transition, and fewer than 20% of GPs were involved in the care of their CC. GPs were more involved in cases of CC instability. According to GPs, their roles included identifying care disruptions, referring to adult services, facilitating coordination, ensuring continuity of care, providing primary care services, and offering psychological support.

Conclusion: Few GPs were involved during the transition; however, most considered their involvement essential for its success. To improve transitional care, it is crucial to inform and actively involve GPs. These results suggest the need to improve cooperation between hospitals and GPs.

**What is known**:

- General practitioners (GPs) have the potential to play a pivotal role in the transition of adolescents and young adults (AYAs) with chronic conditions (CCs) to adult healthcare systems.
- Despite this potential, GPs are rarely involved in the transition process, leading to unsuccessful transitions, characterized by loss of follow-up and increased morbidity and mortality.

**What is new**:

- Few AYAs had their GP involved in managing their CC during the transition period. However, such involvements were more common during periods of CC instability, highlighting GPs' capacity to address critical care needs.
- GPs identified their primary roles as coordination care, identifying disruptions, and providing psychological and primary care support. Nonetheless, they reported significant communication barriers with hospitals.
- Recommendations to enhance GP involvement include implementing structured protocols, improving communication pathways between primary and secondary care, and providing targeted training to strengthen their role in facilitating successful transitions.

**Keywords:** Transition to Adult Care, Chronic Condition, Adolescent Health, General Practitioner, Care Coordination, Primary Care

**List of Abbreviations:**

AYA: Adolescent and Young Adult

A-GP: Attending GP

CC: Chronic Condition

GP: General practitioner

GPOR: GP of reference

**INTRODUCTION**

The concept of transition emerged in the 1990s with the improvement in survival of adolescents and young adults (AYA) with chronic conditions (CCs), [1–3]. Defined as *the purposeful, planned movement of AYA with chronic physical and medical conditions from child-centered to adult-orientated health care systems […], [it helps meet] the medical, psychosocial, and educational/vocational needs of adolescents*[4]. Therefore, transition is not limited to the transfer[5]. This delicate period often leads to a loss of follow-up for AYAs, who do not re-establish contact with the adult health care system until acute decompensation occurs[6, 7]. These unsuccessful transitions subsequently have repercussions on the morbidity and mortality of these AYAs[8–11].

Even if primary care physicians can play an important role in the health care of AYAs, they are rarely involved during the transition to adulthood, and their role is rarely mentioned in the literature, which focuses merely on specialist-to-specialist transition[7, 12–15]. However, a recent British study, which examined more than 400 heterogeneous CCs, unlike our study, which focused on only four, highlighted that AYAs with CCs who consulted their general practitioner (GP) more regularly had fewer emergency hospital admissions and attendances compared to those with less frequent consultations[16]. Nevertheless, limited existing evidence supports the relevance of involving GPs during transition. Earlier studies underscored their role in maintaining continuity of care and providing psychosocial support to adolescents[13, 17]. More recent research has demonstrated that integrating GPs into transition pathways is both feasible and beneficial, particularly in complex care situations or when access to adult specialists is limited[14, 18]. Similarly, consensus among French experts in transition care stated that informing GPs is both relevant and feasible[7], and several international guidelines have emphasized the importance of GPs during transition periods without clearly defining their roles[7, 15, 19–22].

In France, AYA from the age of 16 are encouraged to designate a GP to facilitate coordinated care and optimal reimbursement through the national health insurance system. However, this declaration is not systematic, especially in medically underserved areas such as the northeastern suburbs of Paris, where GP density is lower and access to primary care is more limited[23–26]. For AYAs with CCs, this situation may result in the absence of a GP mentioned in their medical record. Several factors may contribute to this, including limited availability of GPs, the comprehensive role played by hospital-based pediatricians, and fragmented communication between hospital and community care providers[15, 27]. These structural challenges, which will be discussed in detail later in the manuscript, underline the need to better integrate GPs into transitional care pathways.

The objectives of this study were to describe the role of GPs during transition and to identify key elements (helping factors and barriers) of their involvement during transition.

**MATERIALS AND METHODS**

We conducted a single-center observational study with a mixed method approach: (1) a quantitative study based on data from medical records and phone questionnaires completed by GPs; (2) a qualitative study conducted through semi-structured interviews with a panel of GPs. The inclusion criteria for participants were: AYA aged 15 years or more with one of the four CCs (diabetes mellitus, inflammatory bowel disease, epilepsy, sickle cell anemia); receiving care at Robert Debré University Pediatric Hospital in northern Paris; transferred to adult health care for at least one year; living in France. For each CC, 30 AYA were recruited to achieve statistical power.

We conducted a single-center observational study with a mixed method approach: (1) a quantitative study based on retrospective data from medical records and phone questionnaires completed by GPs (**Table S1** “Interview Guide” in the supplementary material); (2) a qualitative study conducted through semi-structured interviews with a panel of GPs. The inclusion criteria for participants were: AYA aged 15 years or more with one of the four CCs (diabetes mellitus, inflammatory bowel disease, epilepsy, sickle cell anemia); receiving care at the University Pediatric Hospital Robert Debré; transferred to adult health care between January 2017 and January 2019; living in France. For each CC, 30 AYA were recruited to achieve statistical power.

For each AYA, all GPs mentioned in the participants’ medical records were contacted for recruitment. For this study, we are using two categories of GPs. Attending GPs (A-GPs), *médecins traitants* in French, are GPs officially registered by all healthcare system users with the French national health insurance (Assurance Maladie) from the age of 16. This administrative step aims to improve care coordination and reduce disruptions in care as well as the overuse of specialist services. GPs of reference (GPORs), *médecins référents* in French, were defined in our study as GPs who had seen the AYA at least once in the two years preceding the study, indicating an active role in their medical follow-up. The A-GP and GPOR may be the same person, but not necessarily. GPORs were considered to be *involved in the AYA's CC management* if they were aware of the name of their CC and if the CC was addressed during at least once of the last two consultations. GPORs were considered as *involved in the transition process* if they had recommended a service or colleague in adult health care.

All GPs were contacted to participate to a phone interview with Doctor Jérémy Puyraimond-Zemmour based on a questionnaire of 32 items (quantitative survey). When questionnaires were fulfilled, GPs were invited to continue with a semi-structured phone interview, exploring their experiences with transition and their relationships with hospitals (qualitative study), until data saturation was reached.

To evaluate the quality of communication between the hospital and the referring general practitioner (GPOR), we defined communication as good if the GP received at least one hospital letter concerning the AYA in the two years preceding the transfer.

In our study, we also defined: medically underserved areas are territories with limited access to primary care services as defined by French health authorities[24], severity and stability of each disease are defined in the supplementary material (**Table S2**), duration of follow-up was calculated based on the date of the first and last visits / appointment at the hospital or with the GP, regularity of pediatric follow-up was calculated based on the number of appointments the AYA had in the two years preceding the transfer, adherence to pediatric follow-up was satisfying if AYA had not missed their last hospital appointment or if they had not missed more than two hospital appointments in the two years preceding the transfer, the discharge letter is the medical report sent by hospital pediatricians to inform adult specialists and GPs of the transfer to adults health care.

Data analysis was conducted using EpiData Analysis (v2.2.3.187) and Epi Info Analysis (v7.2.4.0) softwares. Qualitative data were presented as numbers (percentages), while quantitative data were presented as means (standard deviations). Comparative analysis was conducted using the Chi-square test (if n ≥ 5) and Fisher's exact test (if n ≤ 5) for qualitative data, and the Student's t-test for quantitative data.

This study was conducted in accordance with the Declaration of Helsinki and was approved by the ethics committee of Robert Debré Hospital (IRB 2019.432). Patients and parents received information letters, and only one patient declined to participate.

**RESULTS**

The flowchart of AYAs and doctors included in the study is shown in **Figure 1**. The 30 most recently transferred AYAs from each CC list were included in this study, with the exception of epilepsy, where only 22 AYA have been identified. Of the 112 AYAs included, 91 had at least one GP noted in their medical file. From the medical records, 122 doctors were identified: 20 pediatricians and 102 GPs. Only the GPs were included; out of the 102 GPs, 79 (77.5%) agreed to participate in the study. The majority of interviews were conducted during the first COVID-19 lock-down period, (March 17-May 10, 2020). Quantitative interviews lasted, by means, 6 minutes, and qualitative interviews by means, 11 minutes.

**Table 1a** presents the characteristics of AYAs and their CC. The majority of AYAs (92%) resides in the Paris region and in medically underserved areas (83.9%), with nearly all of them living close to their GP (90%), within the same department, unlike pediatric and adult hospitals which are located farther away.

The age at diagnosis is, by means, 7.5 years, for all pathologies combined, with significant variations. Sickle cell disease is distinguished by a diagnosis at birth, whereas IBD is typically diagnosed much later (by mean 12.4 years). The age at transfer is similar for the four CCs, by mean at 18.7 years.

Despite the challenges of comparing vastly different pathologies (**Table S2** in the supplementary material), more than two-thirds of AYAs present with severe disease (70.5%), albeit with stability (61.6%). Severity is lower in diabetics (46.7%), but with greater instability (53.3%) compared to the other three pathologies. Treatment is complex in 76.8% of AYAs, with large variations between pathologies: half of epileptics (54.5%) and almost all diabetics (93.3%) have a complex treatment (insulin).

The mean durations of follow-up by the pediatric hospital and by the GP before transfer are similar (8.8 and 9.2 years, respectively). Follow-ups are regular and frequent, whether by the pediatric hospital (7.7 appointments per 2 years by mean) or by the GP (5.8 appointments per 2 years by mean). However, more than a quarter of AYAs (26.8%) missed or canceled their last appointments at the hospital.

Regarding the transfer, a discharge letter was present in almost all medical files (89.3%); these letters were complete and precise (98.0%), based on information retrieved from the hospital medical records. However, only 58.0% of the letters were addressed to GPs, and 35.0% to pediatricians. Few adult hospital reports (11.6%) were found in the medical records of the pediatric hospital, although all AYAs have passed to the adult medical system.

**Table 2** presents the characteristics of GPs. The majority of GPs are self-employed (81.5%) in medically underserved areas (81.4%) in the Paris region (93.1%). Almost none have undergone further training (93.8%).

Almost 80% of GPs responded to the quantitative questionnaire and 27 semi-structured interviews were conducted.

Two-thirds of GPs (57.4%) were referents (GPORs), the vast majority of whom are attending (A-GPs).

Almost all GPORs (96.1%) knew the name of the AYA's CC, while 80% of non-referring GPs did. One-third of GPORs (35.3%) was involved in the AYA's CC management. Almost no GPORs (4.3%) are involved in the transition process by advising or redirecting the AYA to adult health care. Only 11 GPORs (22.0%) discussed the transition process during a consultation.

The communication between ambulatory and hospital care was estimated as good during the transition: 40 GPORs (81.6%) received at least one hospital letter (pediatric or adult) during this period, but only 12.5% of hospital reports were sent to GPORs. However, communication deteriorates after the transfer to adult health care for 30% of GPORs who no longer receive hospital letters. Consequently, 34 GPORs (72.3%) were not informed of the transition.

Eighty percent of AYAs have at least one GP mentioned in their medical file, 88% of them have one GP and 12% have two GPs (**Figure 2**).Twenty AYA are followed by a pediatrician, twelve of whom also have a GP. Half of AYAs (51.4%) have a GPOR. One-third of GPORs (35.3%) are involved in the AYA's CC management.

Overall, only a small minority (17.1%) of AYAs have a GPOR who is involved in the AYA's CC management. Almost half of AYAs (48.6%) had no referring GP.

The multivariate analysis (**Table 3**) shows that the disease imbalance is significantly linked to the GPOR involvement (p<0.01). The other factors do not have a significant relationship with the GPOR involvement.

Concerning the expectations of GPs regarding the hospital and their perceived role during transition (**Figure S1** in the supplementary material), it emerged from semi-structured interviews that communication with the hospital seemed satisfactory but highly variable depending on the hospital and the department. The relationship with hospital specialists was considered quite good, but GPs found it difficult to reach specialists by phone, while communication by email seemed easier. Consequently, some GPs reported sharing their personal mobile number for the sake of convenience. Several GPs believed communication might be improved by organizing joint meetings that gather GPs and specialists. GPs reported that medical reports were not systematically sent to them, even in electronic form, and were often received late. For most GPs, medical letters took too long to read and lacked specificity. Some GPs suggested that a follow-up protocol should be included for helping GPs.

Thanks to their perceived special relationship with the AYA, GPs believed they can prevent loss of follow-up by identifying them and redirecting the AYA to a trusted adult environment. This relationship, described by GPs as a long-term and trusting connection, appears to enable them to provide not only medical care, but also emotional and psychological support. GPs consider this connection essential for ensuring continuity of care, particularly during the transition to adult services.

However, as several physicians stated, this requires hospitals to involve GPs more often in the AYA's care, particularly during transition, for example, to prescribe and adjust basic treatments, which they also see as an opportunity for therapeutic education. Several GPs also emphasized that, unlike pediatricians who routinely schedule follow-up appointments, GPs typically wait for patients to initiate contact. This difference in practice was seen as a potential barrier to continuity of care, especially during transition. In addition, several GPs reported that hospital pediatricians often handled routine care without encouraging AYAs to see their GP, which they believed could limit their involvement before transition. Thus, several GPs underlined that it is important to talk about transition during consultations, whether dedicated or not, in order to reinforce trust with the AYA and avoid transition failures.

**DISCUSSION**

Although 80% of AYAs have a GP reported in their medical records, only half have a referring GP and a small percentage of these GPs were involved in monitoring their CC. Moreover, these GPs are rarely included in the transition process and are seldom involved in monitoring AYA's CC.

These results are consistent with the existing literature: two studies, one Canadian [17] and one British [18], published in 2018 and 2020 respectively, demonstrate that most AYA do not have regular follow-up with their GP, even if they lived with a CC. This is also observed in another British study[28], where GPs are often absent from the care of children and AYA with CC, even though their role can be significant, including in life-limiting and life-threatening conditions. A more recent British study[16] shows that the involvement of GPs in the care of children and AYAs with CC appears to reduce the risk of emergency hospital admissions.

Several factors can explain why 20% of AYAs don't have a GP in their medical record, and why their GP isn't always involved in the management of the CC or in the transition of care. First, although AYAs aged 16 and over are encouraged to declare a GP to the French social security system, this declaration remains optional and is not systematically done, particularly in medically underserved areas such as the Paris region[23–25]. Second, before transition, routine care is often managed by hospital pediatricians, which may limit the perceived necessity of involving a GP, and who do not sufficiently encourage AYA to consult a GP, as reported by several GPs interviewed in our qualitative study[7, 13, 29]. This may also help explain why only 58% of discharge letters in our study were addressed to GPs, as their role is not always clearly defined or activated in hospital-based care[7]. Additional factors, such as incorrect or incomplete GP addresses, the loss of paper-based hospital reports sent by post, and an aging medical workforce with unreplaced retirements, may also contribute to this issue. Moreover, the fact that 72% of GPORs were not informed of the transition may point to an even broader issue: not only poor communication between hospital teams and GPs, but also insufficient coordination between pediatric and adult hospital departments, as adult specialists could have retrieved the GP’s information from their pediatric colleagues. In addition, the predominance of self-employed GPs in France, where hospital-based positions are extremely rare, as reported in the literature[30], may help explain their limited structural integration into hospital-led care pathways, which can further hinder their involvement in coordinated transitions. Third, the absence of a GP in the medical record may reflect an omission, or may result from weak or inconsistent communication between hospital teams and community providers, due to the lack of structured protocols and time constraints[27]. Other factors likely play a role, including socio-economic difficulties and a lack of health education among AYA regarding their need to take care of their global health (e.g., maintaining regular follow-ups, discussing preventive care, or addressing psychosocial challenges). Moreover, parents of AYAs with CC, who may share the same GP as their child, do not consult their GP often enough, despite their own mental and physical vulnerability[31]. All these factors increase the vulnerability of these AYAs living with CC.

GPs are more involved in situations of CC instability where health needs are greater. This is particularly interesting because one-third of AYAs experience unstable CC during transition. However, this result is intriguing because most GPs do not feel comfortable managing AYA’s CC. Regardless, greater investment of GPs in this situation may be explained by a direct request from the AYA regarding their condition, or by GPs' desire to conduct a reassessment or monitoring of the AYA's CC. GPs’ empathy may also play a role in their involvement, as their emotional connection and long-standing relationship with AYAs is likely to motivate them to remain engaged and supportive during transition. Their role complements that of pediatricians, who are primarily responsible for managing the medical aspects of CCs. GPs, on the other hand, ensure overall health management, offering continuous support as AYAs transition to adult care.

Overall, our observations seem to encourage involving GPs in the transition process at any step. As mentioned by the American Academy of Pediatrics in their transition guidelines, transferring to adult primary care clinicians could be the initial step, allowing these clinicians to assist in locating and/or coordinating adult subspecialty or behavioral care providers as needed. In the absence of a specific adult subspecialist, transitioning the young adult to an adult primary care clinician, with consultation from the pediatric subspecialist, could be an interim solution until adult clinicians acquire the necessary subspecialty knowledge or appropriate adult subspecialists become available[15].

Communication between GPs and hospital specialists appeared satisfying regarding that a majority of GPs received hospital reports during transition. However, there are several contradictions between quantitative and qualitative results: although communication with hospital is good, GPs complained that specialists were not easily reachable; GPs would like to receive more hospital letters, even though they do not have enough time to read them; They would also like to be more involved in decisions despite their lack of time and knowledge about CC affecting AYA. If GPs were involved in the medical care of AYAs, there would likely be fewer transition failures. There are key-elements for improving transition, as identified by experts in Enora Le Roux's study[7].

Despite these observations, solutions can be proposed to enhance GPs-specialists communication and increase GP involvement during transition. Although several guidelines emphasize the importance of involving GPs in the follow-up care of AYAs, particularly during transition, their role is not clearly defined[7]. Based on recommendations, expectations of GPs, and experiences from AD'venir (Robert Debré's hospital transition platform) regarding feasibility, several guidelines for including GPs in the transition process can be proposed:

- To facilitate GPs' involvement during transition, hospital specialists should verify that AYAs have a GP, and ensure that the physician’s name is included in the medical record. AYA should be encouraged to see their GP regularly, who should be notified if a risky situation arises. To enhance communication with GPs, meetings between hospital specialists and GPs can be organized. Senior physicians' hotlines can provide easy access to hospital specialists. Likewise, a dedicated professional phone line for GPs, distinct from the patient line and without secretarial filtering, could facilitate reciprocal communication between GPs and hospital specialists. Finally, the drafting of a specific discharge letter is essential: it must be concise and should propose a care protocol for GPs, including contact information for adult specialists (phone number and email).

- To assist GPs in managing AYA, training seminars on adolescent medicine and transition could be organized to improve skills and enhance collaboration: this would raise awareness within the medical community about transition and help create care networks for AYA, where the role of GPs would be clearly defined. Some practical guidelines with a clear and concise roadmap can be suggested to GPs, especially to discuss transition during medical appointments, to see AYA between hospital appointments, and to schedule regular consultations dedicated to CC and transition. The privileged relationship that GPs have with AYAs can help to resolve risky situations of breakdown in care by re-establishing trust with the medical system and redirecting AYAs to adult specialists. This relationship, which persists even after the transfer to adult care, provides stability for AYAs and helps guide them through the transition process.

This study is one of the first to explore the role of GPs during transition. We obtained more accurate responses due to a mixed-method research design. The inclusion of a large number of subjects and the high response rate of physicians contributed to a robust statistical power. In addition, semi-structured interviews facilitated spontaneity and free expression. Doctors' speeches were also liberated by the fact that the investigator of this study was also a GP. The results of this study can be applied not only to the healthcare system of a large city in France but also to other regions where access to healthcare may be more challenging, rendering certain guidelines even more relevant. The included CCs are interesting transition models due to their frequencies and health consequences for AYA in case of breakdowns in care, as well as the improvement of AYA's survival into adulthood.

However, there are some limitations to our study. This is a single-center study conducted in a Parisian university hospital; therefore, follow-up and transition modalities may vary in non-teaching provincial hospitals. Several interesting variables could not be studied due to a high rate of missing data in the medical records and during interviews with GPs: these incomplete responses are associated with a lack of time for GPs, and moreover, a memory bias may have influenced the responses of some physicians. Some important topics were not addressed in this study, such as training GPs in adolescent medicine. Finally, the roles of non-hospital pediatricians were not studied here because few AYA (less than 10%) were followed by them: it raises questions about whether they assisted in AYA's transition to an adult hospital unit and whether they facilitated handover to GPs.

In conclusion, half of AYAs were followed by a GP during transition, and less than a quarter of GPs were involved in the AYA's CC management. However, GPs believed they have a key role during transition and appeared to be more involved when the CC was destabilized. It is therefore important to enhance communication between hospital specialists and GPs to foster their involvement in the transition process. Continuing this work to explore the perspectives of hospital specialists, AYAs, and their parents would be valuable in further elucidating the roles of various stakeholders in AYAs’ health.

**BIBLIOGRAPHY**

1. Blum RW (1995) Transition to adult health care: setting the stage. J Adolesc Health 17:3–5. https://doi.org/10.1016/1054-139X(95)00073-2

2. Hardelid P, Dattani N, Gilbert R (2014) Estimating the prevalence of chronic conditions in children who die in England, Scotland and Wales: a data linkage cohort study. BMJ Open 4:e005331. https://doi.org/10.1136/bmjopen-2014-005331

3. Perrin JM, Anderson LE, Van Cleave J (2014) The rise in chronic conditions among infants, children, and youth can be met with continued health system innovations. Health Aff (Millwood) 33:2099–2105. https://doi.org/10.1377/hlthaff.2014.0832

4. Blum RW, Garell D, Hodgman CH, et al (1993) Transition from child-centered to adult health-care systems for adolescents with chronic conditions. A position paper of the Society for Adolescent Medicine. J Adolesc Health 14:570–576. https://doi.org/10.1016/1054-139x(93)90143-d

5. Surís J-C, Bélanger RE, Ambresin A-E, et al (2011) Extra burden of psychosomatic complaints among adolescents suffering from chronic conditions. J Dev Behav Pediatr 32:328–331. https://doi.org/10.1097/DBP.0b013e3181fa5727

6. Suris J-C, Akre C (2015) Key elements for, and indicators of, a successful transition: an international Delphi study. J Adolesc Health 56:612–618. https://doi.org/10.1016/j.jadohealth.2015.02.007

7. Le Roux E, Mellerio H, Jacquin P, et al (2019) Practical generic guidelines for paediatric-to-adult transition for adolescents with chronic disease. Eur J Public Health 29:442–448. https://doi.org/10.1093/eurpub/cky258

8. Rachas A, Tuppin P, Meyer L, et al (2018) Excess mortality and hospitalizations in transitional-age youths with a long-term disease: A national population-based cohort study. PLoS One 13:e0193729. https://doi.org/10.1371/journal.pone.0193729

9. Jarvis S, Flemming K, Richardson G, Fraser L (2022) Adult healthcare is associated with more emergency healthcare for young people with life-limiting conditions. Pediatr Res 92:1458–1469. https://doi.org/10.1038/s41390-022-01975-3

10. Samuel SM, Nettel-Aguirre A, Soo A, et al (2014) Avoidable hospitalizations in youth with kidney failure after transfer to or with only adult care. Pediatrics 133:e993-1000. https://doi.org/10.1542/peds.2013-2345

11. Agwu AL, Lee L, Fleishman JA, et al (2015) Aging and loss to follow-up among youth living with human immunodeficiency virus in the HIV Research Network. J Adolesc Health 56:345–351. https://doi.org/10.1016/j.jadohealth.2014.11.009

12. Blum R, Hirsch D, Kastner TA, et al (2002) A consensus statement on health care transitions for young adults with special health care needs. Pediatrics 110:1304–1306

13. Scal P (2002) Transition for youth with chronic conditions: primary care physicians’ approaches. Pediatrics 110:1315–1321

14. Toulany A, Gorter JW, Harrison M (2022) A call for action: Recommendations to improve transition to adult care for youth with complex health care needs. Paediatr Child Health 27:297–309. https://doi.org/10.1093/pch/pxac047

15. White PH, Cooley WC (2018) Supporting the Health Care Transition From Adolescence to Adulthood in the Medical Home. Pediatrics 142(5):e20182587. https://doi.org/10.1542/peds.2018-2587

16. Jarvis S, Parslow RC, Hewitt C, et al (2020) GPs’ role in caring for children and young people with life-limiting conditions: a retrospective cohort study. Br J Gen Pract 70:e221–e229. https://doi.org/10.3399/bjgp20X708233

17. Han AX, Whitehouse SR, Tsai S, et al (2018) Perceptions of the family physician from adolescents and their caregivers preparing to transition to adult care. BMC Fam Pract 19:140. https://doi.org/10.1186/s12875-018-0830-6

18. Colver A, Rapley T, Parr JR, et al (2020) Facilitating transition of young people with long-term health conditions from children’s to adults’ healthcare services - implications of a 5-year research programme. Clin Med (Lond) 20:74–80. https://doi.org/10.7861/clinmed.2019-0077

19. (2009) Paediatric Chronic Disease Transition Framework. WA Child and Youth Health Network Department of Health, State of Western Australia

20. (2016) A Guideline for Transition From Paediatric to Adult Health Care for Youth with Special Health Care Needs: A National Approach. National Transitions Community Practice Canadian Association of Paediatric Health Centres

21. (2017) Provincial Guidelines for Transitional Care of Paediatric Epilepsy Programs to Adult. Epilepsy Implementation Task Force Critical Care Services Ontario

22. Singh SP, Anderson B, Liabo K, Ganeshamoorthy T (2016) Supporting young people in their transition to adults’ services: summary of NICE guidance. British Medical Journal

23. (2021) Demographic trends and regional disparities in general practitioner density: Annual report 2021. Île-de-France Regional Health Agency (ARS)

24. (2022) Medical zoning: map of areas eligible for GP installation and retention incentives. In: Île-de-France Regional Health Agency (ARS). https://www.iledefrance.ars.sante.fr/zonage-medecins-2022-carte-des-zones-concernees-par-les-aides-linstallation-et-au-maintien-des

25. Gusmano MK, Weisz D, Rodwin VG, et al (2014) Disparities in access to health care in three French regions. Health Policy 114:31–40. https://doi.org/10.1016/j.healthpol.2013.07.011

26. Barlet M, Le Guen N In 2018, areas with low general practitioner supply affected nearly 6% of the French population. Directorate for Research, Studies, Evaluation and Statistics (DREES), French Ministry of Health Studies and Results:November 2020

27. Sánchez-Sagrado T (2016) [Primary care in France]. Semergen 42:58–62. https://doi.org/10.1016/j.semerg.2015.07.004

28. Mitchell S, Harding S, Samani M, et al (2021) Experiences of general practice of children with complex and palliative care needs and their families: a qualitative study. BMJ Open 11:e041476. https://doi.org/10.1136/bmjopen-2020-041476

29. Schraeder KE, Dwyer-Matzky K, Blom T (2022) A qualitative analysis of multidisciplinary pediatric subspecialty providers’ perspectives on transitioning to adult-oriented care. Journal of Primary Care & Community Health 1–9

30. Davin-Casalena B, Scronias D, Videau Y, Verger P (2024) How general practitioners in France are coping with increased healthcare demand and physician shortages. A panel data survey and hierarchical clustering. Health Policy 149:105175. https://doi.org/10.1016/j.healthpol.2024.105175

31. Fraser LK, Murtagh FE, Aldridge J, et al (2021) Health of mothers of children with a life-limiting condition: a comparative cohort study. Arch Dis Child 106:987–993. https://doi.org/10.1136/archdischild-2020-320655

**STATEMENTS & DECLARATIONS:**

*Funding:* The authors declare that no funds, grants, or other support were received during the preparation of this manuscript.

*Competing Interests:* The authors have no relevant financial or non-financial interests to disclose.

*Availability of data and material:* The authors will be able to share all data and material for future research, under request.

***Authors’ contribution:***

**Dr. Puyraimond-Zemmour conceptualized and designed the study, collected data from medical records, conducted interviews with general practitioners (GPs), performed data analysis, drafted the initial manuscript, and reviewed and revised it.**

**Dr. Jacquin and Dr. Mellerio contributed to the study's conceptualization and design, and critically reviewed and revised the manuscript. Dr. Mellerio also supervised and reviewed the statistical analyses.**

**Pr. Auvin, Dr. Bismuth, Dr. Holvoet, and Dr. Martinez-Vinson coordinated and supervised data collection.**

**Pr. Zerr, Pr. Meinzer, and Pr. Koehl critically reviewed the manuscript.**

*Ethics approval:* This study was conducted in accordance with the principles of the Declaration of Helsinki. The research involved human participants and received approval from the Ethics Committee of Robert Debré Hospital (Approval No. 2019/432).

*Consent to participate:* All participants (or their parents or legal tutors if participants were minors) were informed about the research through an information letter, which stated the opposition procedure. Information letters specified that the data collected for this research would be published in an anonymized form.

*Acknowledgments:*The authors are deeply grateful to Pr. Albert Faye (Department of General Pediatrics, Pediatric Internal Medicine, Rheumatology, and Infectious Diseases, Robert-Debré Hospital, AP-HP, Paris, France) for his pivotal role in bringing this project to life. They also wish to thank all the general practitioners who participated in this study.

**TABLES**

| **Table 1. Sample characteristics of AYA participants** | | |
| --- | --- | --- |
| Characteristics | n (%) or mean (SD) (range) | Available data (AD) |
| Male gender, n (%) | 67 (59.8) | 112 |
| Age (in years)  at diagnosis, mean (SD) (range)  during transfer, mean (SD) (range) | 7.5 (5.9) (0.0; 17.1)  18.7 (1.0) (16.5; 21.2) | 104  112 |
| Living in medically underserved areas, n (%) | 55 (49.1) | 112 |
| With GPs registered in their medical record, n (%) | 91 (81.3) | 112 |
| Type of CCs, n (%)  Diabetes mellitus  type 1, n (%)  other types, n (%)  Inflammatory bowel disease  Crohn’s disease, n (%)  ulcerative colitis, n (%)  Epilepsy  focal epilepsy, n (%)  multifocal or generalized epilepsy, n (%)  epileptic encephalopathy, n (%)  Sickle cell anemia  with SS genotype, n (%)  with G6PD deficiency, n (%) | 112 (100)  26 (86.7)  4 (13.3)  27 (90.0)  3 (10 .0)  7 (31.8)  5 (22.7)  10 (45.5)  25 (83.3)  4 (13.3) | 112  30  30  22  30 |
| Of which:  severe CC, n (%)  stable CC, n (%)  complex treatments, n (%) | 79 (70.5)  69 (61.6)  86 (76.8) | 112  112  112 |
| Length of follow-up before transfer (in years)  in pediatric hospital, mean (SD) (range)  with the GP, mean (SD) (range) | 8.8 (5.3) (1.0; 20.5)  9.2 (5.8) (0.0; 18.7) | 112  75 |
| Regularity of the follow-up during transition (number of medical appointments in the two years preceding the transfer)  in pediatric hospital, mean (SD) (range)  with the GP, mean (SD) (range) | 7.7 (5.0) (1.0; 27.0)  5.8 (4.9) (1.0; 30.0) | 112  78 |
| Adherence to hospital-based monitoring during transition, n (%) | 82 (73.2) | 112 |
| Number of hospital appointments missed or canceled per AYA during the two years before transfer, mean (SD) (range) | 1.25 (1.7) (0; 10) | 112 |
| Written up to date medical summery (discharge letter)  present, n (%)  send to GPs, n (%) | 100 (89.3)  65 (58.0) | 112  112 |

| **Table 2. Sample characteristics of general practitioners** | | | | |
| --- | --- | --- | --- | --- |
|  | Quantitative data | | Qualitative data | |
| Characteristics | n (%) or mean (SD) (range) | AD | n (%) or mean (SD) (range) | AD |
| Total | 102 (100 %) |  | 27 (100 %) |  |
| Attending GPs (*médecins traitants*), n (%) | 53 (60.9) | 87 | 21 (77.8) | 27 |
| No attending and no referring GPs, n (%) | 30 (34.9) | 86 | 5 (18.5) | 27 |
| GPs of reference (*médecins référents*), n (%)  Involvement in AYA's CC management  Involvement in the transfer to adult health care  existing communication between GPORs and hospital  troubles due to a lack of health care data  the need to call a hospital practitioner  CCs follow-up by the GPORs  diabetes mellitus  inflammatory bowel disease  epilepsy  sickle cell anemia  Reasons of the last two consultations  chronic condition  intercurrent infection  prevention  other | 54 (57.4)  18 (35.3)  2 (4.3)  40 (81.6)  4 (8.9)  2 (4.9)  17 (31.5)  16 (29.6)  6 (11.1)  15 (27.8)  17 (19.8)  31 (36.0)  7 (8.1)  31 (36.0) | 94  51  47  49  45  41  54  86 | 21 (77.8)  10 (50.0)  1 (5.3)  16 (80.0)  3 (15.8)  2 (10.5)  10 (37.0)  5 (18.5)  2 (7.4)  10 (37.0)  8 (22.9)  11 (31.4)  2 (5.7)  14 (40.0) | 27  20  19  20  19  19  21  35 |
| Male gender, n (%) | 68 (66.7) | 101 | 15 (55.6) | 27 |
| Age in years, mean (SD) (range) | 57.6 (9.5) (30; 72) | 80 | 55.1 (8.6) (33; 67) | 27 |
| Practicing in medically underserved areas, n, (%) | 83 (81.4) | 102 | 25 (92.6) | 27 |
| GPs’ medical practices  self-employed, n (%)  salaried status, n (%)  mixed (self-employed and salaried), n (%) | 66 (81.5)  12 (14.8)  3 (3.7) | 81 | 22 (81.5)  4 (14.8)  1 (3.7) | 27 |
| GPs with additional qualifications  pediatric / psychology / diabetology, n (%) | 5 (6.3) | 80 | 1 (3.7) | 27 |
| A-GP (*médecin traitant*): primary care physician designed by the AYA to the French social security  GPOR (*médecin référent*): GP which met the AYA at least twice in the last two years before the call  Involvement in CC management: if one of the last two appointments was referring to the CC  Involvement in the transition process: if GP advised the AYA about an adult unit or an adult specialist | | | | |

| **Table 3. Factors influencing GPORs involvements during transition** | | | | | |
| --- | --- | --- | --- | --- | --- |
| Characteristics | Descriptive statistics | | Uni-variate analysis | Multi-variate analysis |  |
|  | YES (n=18) | NO (n=33) | p-value | OR (95%C.I.) | p-value |
| Gender of AYAs  female, n (%)  male, n (%) | 9 (50.0)  9 (50.0) | 15 (45.5)  18 (54.5) | 0.76 |  |  |
| AYA living in medically underserved areas  yes, n (%)  no, n (%) | 6 (33.3)  12 (66.7) | 17 (51.5)  16 (48.5) | 0.21 |  |  |
| AYA with school difficulties/special education  no, n (%)  yes, n (%)  na, n | 5 (55.6)  4 (44.4)  9 | 7 (38.9)  11 (61.1)  15 | 0.45 |  |  |
| AYA with language barrier  no, n (%)  yes, n (%)  na, n | 17 (94.4)  1 (5.6)  0 | 27 (93.1)  2 (6.9)  4 | 1.00 |  |  |
| Age at diagnosis  child, baby, newborn, n (%)  adolescent, n (%)  na, n | 9 (60.0)  6 (40.0)  3 | 19 (63.3)  11 (36.7)  3 | 0.83 |  |  |
| CCs follow-up by the GPORs  diabetes mellitus, n (%)  inflammatory bowel disease, n (%)  epilepsy, n (%)  sickle cell anemia, n (%) | 5 (27.8)  5 (27.8)  2 (11.1)  6 (33.3) | 11 (33.3)  10 (30.3)  4 (12.1)  8 (24.2) | 0.92 |  |  |
| AYA with severe CC  no, n (%)  yes, n (%) | 6 (33.3)  12 (66.7) | 11 (33.3)  22 (66.7) | 1.00 |  |  |
| AYA with stable CC  no, n (%)  yes, n (%) | 12 (66.7)  6 (33.3) | 7 (21.2)  26 (78.8) | < 0.01 | 6.9 (1.7; 27.3) | < 0.01 |
| AYA with complex treatment  no, n (%)  yes, n (%) | 5 (27.8)  13 (72.2) | 8 (24.2)  25 (75.8) | 1.00 |  |  |
| AYA with A-GPs  no, n (%)  yes, n (%)  na, n | 0 (0.0)  17 (100.0)  1 | 3 (9.4)  29 (90.6)  1 | 0.54 |  |  |
| GPs with additional qualifications  no, n (%)  yes, n (%)  na, n | 18 (100.0)  0 (0.0)  0 | 28 (90.3)  2 (9.7)  2 | 0.29 |  |  |
| Length of follow-up before transfer (in months), mean (SD) | 132.7 (70.4) | 120.1 (68.8) | 0.54 |  |  |
| Presence of a discharge letter  no, n (%)  yes, n (%) | 1 (5.6)  17 (94.4) | 2 (6.1)  31 (93.9) | 1.00 |  |  |
| GPs contact info specified in the discharge letter  no, n (%)  yes, n (%) | 5 (27.8)  13 (72.2) | 8 (24.2)  25 (75.8) | 1.00 |  |  |
| Existing communication between GPORs and hospital  no, n (%)  yes, n (%)  na, n | 1 (5.9)  16 (94.1)  1 | 8 (25.8)  23 (74.2)  2 | 0.13 | 6.7 (0.7; 68.3) | 0.11 |
| * Chi2 test if n ≥ 5; Fisher test if n ≤ 5; Student's t-test for means  Of the 54 GPORs, 3 physicians were not included in the univariate and multivariate analyses because their involvement was not known. | | | | | |

**FIGURES**

**Figure 1. Flowchart**

**
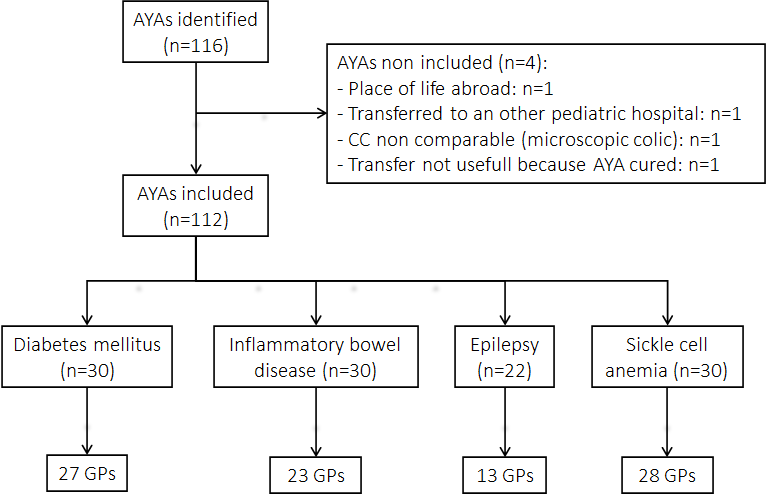
**

**Figure 2. Existence and involvement of GPs and pediatric physicians**

**
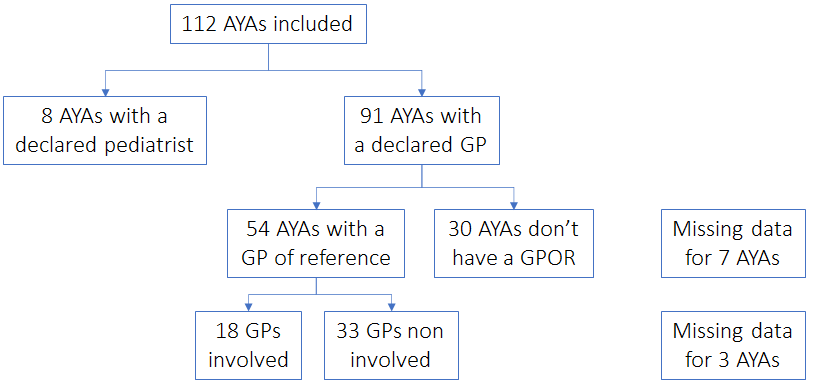
**
