# Supplementary material for: The Role of General Practitioners in Transitioning Adolescents with Chronic Conditions to Adult Health Care
Source: Research Square preprint supplement (doi:10.21203/rs.3.rs-5887321/v1), 2025-05-06
Supplement: Supplementary file 3 [file c562330221c68add35bf48ac.docx]

**SUPPLEMENTARY MATERIAL**

| **Table S1: Interview Guide of GPs** |
| --- |
| **A. Quantitative Section**   1. Did you receive the information letter sent by postal mail? 2. If not: would you like me to resend it by email? |
| **Regarding your patient and their follow-up**   1. Do you know this patient? Since when? 2. Does the patient speak French fluently? 3. Are you their primary care physician? 4. Are you the family doctor? 5. How many times have you seen this patient in the past two years? 6. When was the last consultation? 7. What were the reasons for the last two consultations? |
| **Regarding their illness and pediatric care**   1. Are you familiar with their chronic illness (even roughly)? 2. Have you been regularly informed by the pediatric department about their condition? (If yes, how: by post, email, or phone?) 3. How many hospital reports from Robert Debré have you received in the past two years? 4. Have you faced any clinical challenges due to a lack of information? (If yes: related to a prescription, an emergency, advice, etc.?) 5. Did you need to call the hospital specialist? Were you able to reach them? |
| **Regarding the transition from pediatrics to adult care**   1. Were you consulted before the transfer? 2. Did you recommend a particular department or colleague? 3. Do you know who is currently following the patient for their chronic condition? 4. Have you received any letters from the adult care team now in charge of the patient? 5. Do you know whether the patient is indeed being followed by this new provider? (letter, report, prescription, patient’s own statement?) 6. If the patient is no longer (or was not) followed by a specialist:    1. Do you feel you can provide sufficiently safe care for them (e.g., recognize warning signs)?    2. Do you know whom to ask for guidance on how to proceed? (contact the hospital department, refer the patient again?) |
| **And finally, about yourself:**   1. How old are you? 2. What is your practice type? (private, salaried, mixed) 3. Have you completed any additional training (university diplomas, continuing medical education) or are you part of a care network in any of the following fields: adolescent medicine, pediatrics, psychology, sickle cell disease, diabetology/endocrinology, hepatology/gastroenterology, epileptology/neurology? |
| **B. Qualitative Section**   1. What is your opinion on the relationship between community-based medicine and hospital specialists? Have you experienced difficulties with the doctors following this patient? If so, why? 2. In your opinion, what should be the role of the general practitioner (primary care physician) in managing the transition from pediatric to adult services? 3. What suggestions would you make to improve the transition process? |

| **Table S2: Chronic conditions classification* according to their severity, stability and complexity** | | | |
| --- | --- | --- | --- |
|  | Severity | Stability | Complexity of treatments |
| Diabetes mellitus[25–29] | ≥ 1 hospitalization for a severe acute complication (ketoacidosis, severe hypoglycemia) occurring in the year prior to the transfer  ≥ 1 chronic degenerative complication (micro-albuminuria, retinopathy) | Two groups were created based on the average HbA1c levels among adolescents:  - HbA1c ≤ 8.5%  - HbA1c > 8.6 | Equivalent complexity of all insulin treatments |
| Inflammatory bowel disease[30] | Deep colonic ulcerations on endoscopy  Persistent severe disease despite adequate induction  Extensive (pan-enteric) disease  Marked growth retardation N−2.5 (minus 2.5) height Z scores)  Severe osteoporosis (≥ 2.5 SD with osteoporotic fracture  Stricturing and penetrating disease at onset  Severe perianal disease  Severe extra-intestinal manifestations (arthritis, pyoderma gangrenosum) | CRP < 10 mg/L  Albumin < 35 g/L  < 1 decompensation in the year prior to transfer  < 1 hospitalization for an acute complication in the year preceding the transfer | Immunosuppressants and biotherapies |
| Epilepsy[31] | Intellectual disability  Behavior disorders  Drug resistance | < 2 attacks in the 2 years preceding the transfer  < 1 acute decompensation in the year preceding the transfer  Disappearance of generalized seizures despite the persistence of focal seizures | Drug resistance: persistence of frequent or disabling epileptic seizures despite treatment well conducted for at least two years (i.e., sequential monotherapy of at least two major drugs, then dual therapy for a sufficient duration) |
| Sickle cell anemia[32] | Acute chest syndrome  Hyperalgesic vaso-occlusive crisis requiring morphine  Hospitalization in intensive care whatever the reason  Cerebral vasculopathy with or without stroke  Regular transfusion therapy | < 1 hospitalization for an acute complication in the year preceding the transfer | Chemotherapy (hydroxycarbamide) |
| *The classification above has been defined according to the latest medical guidelines. In the absence of consensus, the criteria were proposed by the hospital referees of the Robert Debré hospital. | | | |

**Figure S1: GPs expectations of the hospital (left side) and their perceived role (right side) during transition**
